# Supplementary material for: Infantile Krabbe disease (0–12 months), progression, and recommended endpoints for clinical trials
Source: PubMed Central journal article supplement (PMC11651195; doi:10.1002/acn3.52114), 2024-11-05
Supplement: ACN3-11-3064-s007.pdf [file ACN3-11-3064-s007.pdf]

# PDMS Gross Motor Quotient

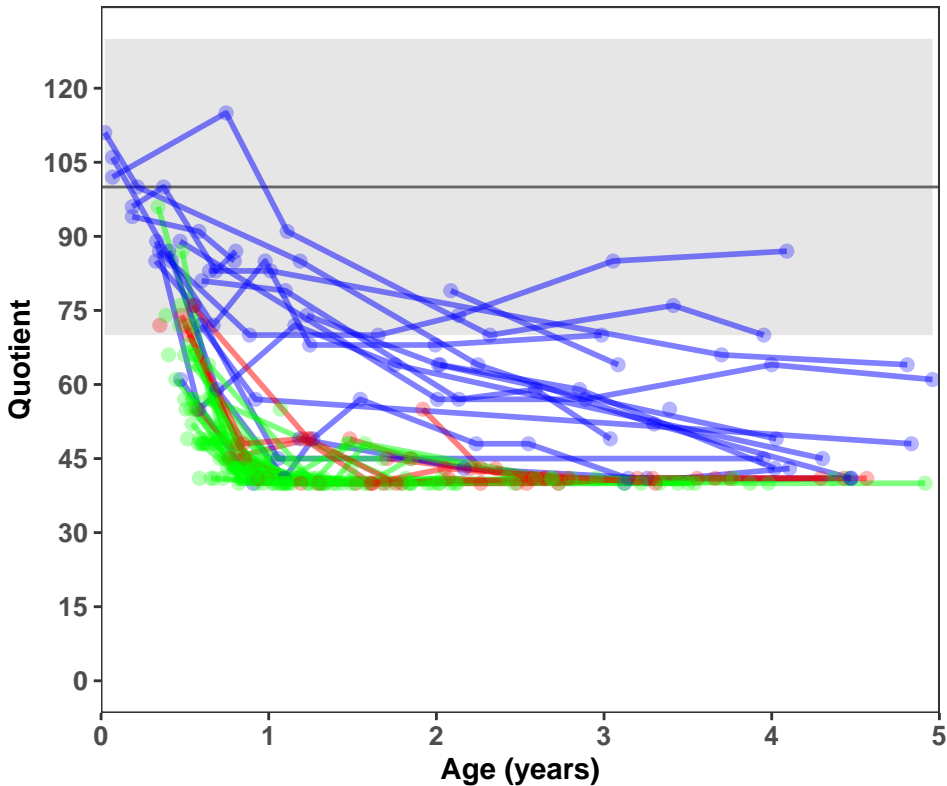

—●— NH    —●— Symptomatic HSCT    —●— Asymptomatic HSCT
