# Supplementary material for: Infantile Krabbe disease (0–12 months), progression, and recommended endpoints for clinical trials
Source: PubMed Central journal article supplement (PMC11651195; doi:10.1002/acn3.52114), 2024-11-05

0 1 2

A. Cognitive Group Means

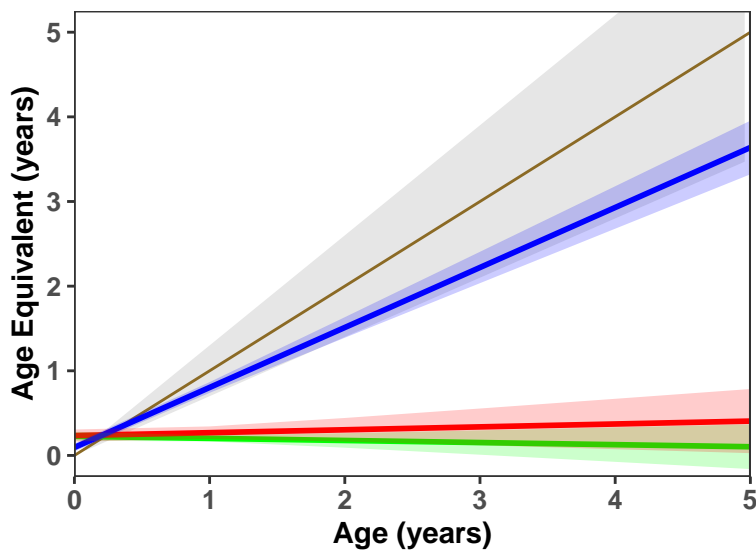

B. Adaptive Group Means

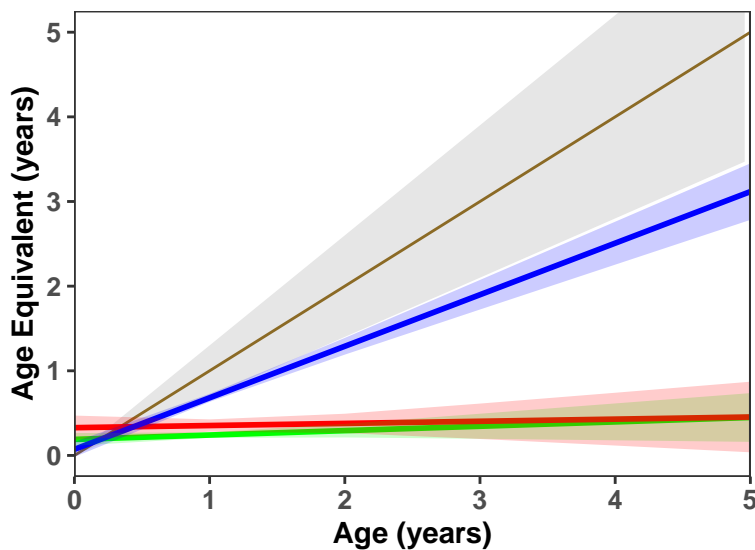

C. Receptive Language Group Means

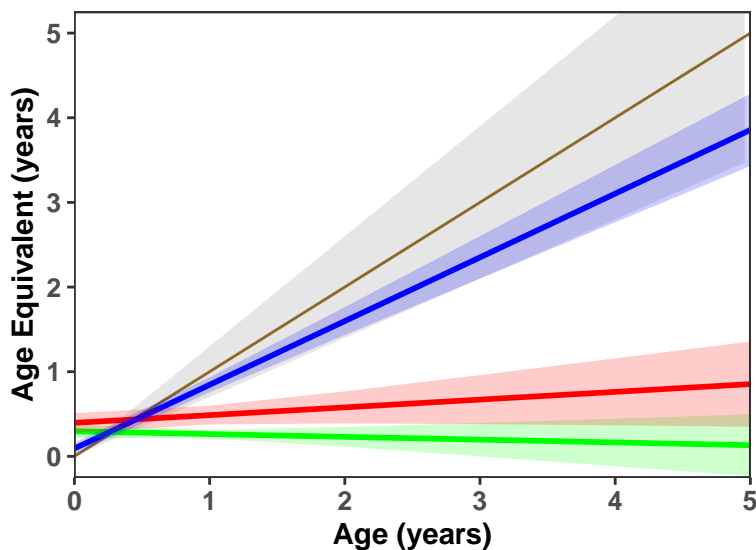

D. Expressive Language Group Means

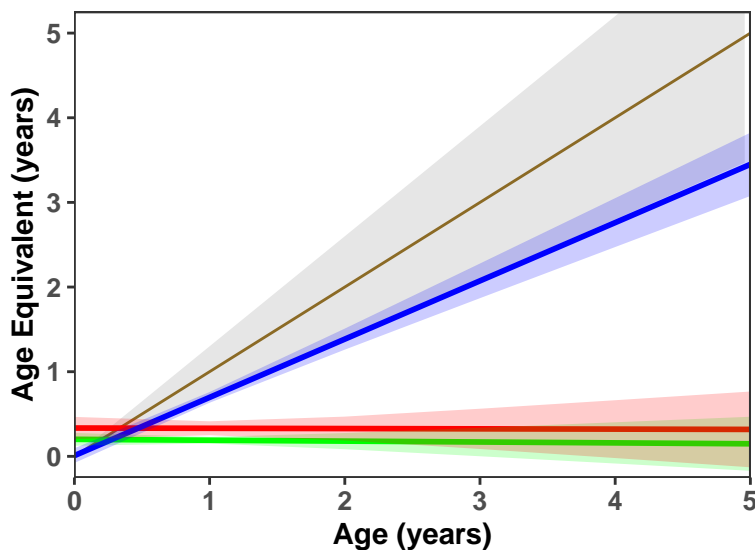

E. Gross Motor Group Means

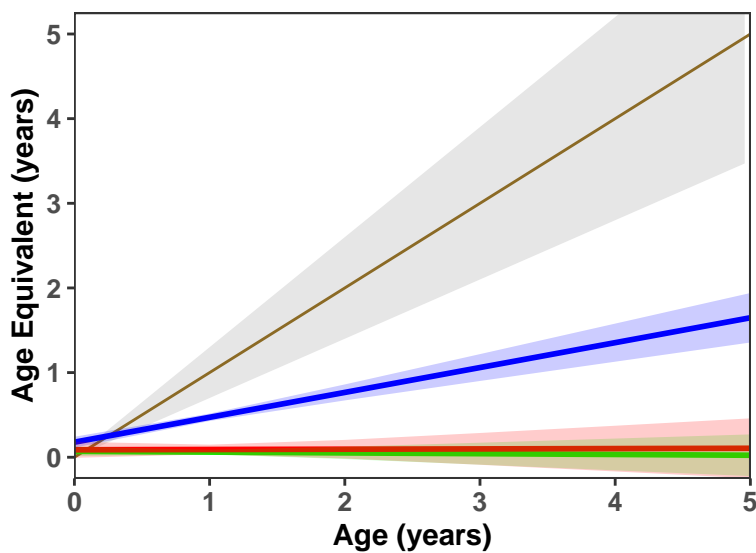

F. Fine Motor Group Means

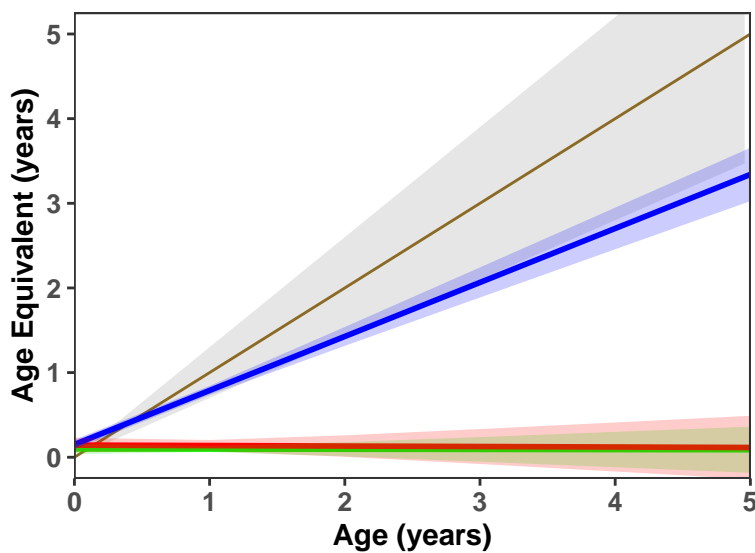

Supplement: ACN3-11-3064-s012.pdf [file ACN3-11-3064-s012.pdf]
