# Supplementary material for: Infantile Krabbe disease (0–12 months), progression, and recommended endpoints for clinical trials
Source: PubMed Central journal article supplement (PMC11651195; doi:10.1002/acn3.52114), 2024-11-05

PDMS Gross Motor Quotient:  
Asymptomatic HSCT Mean

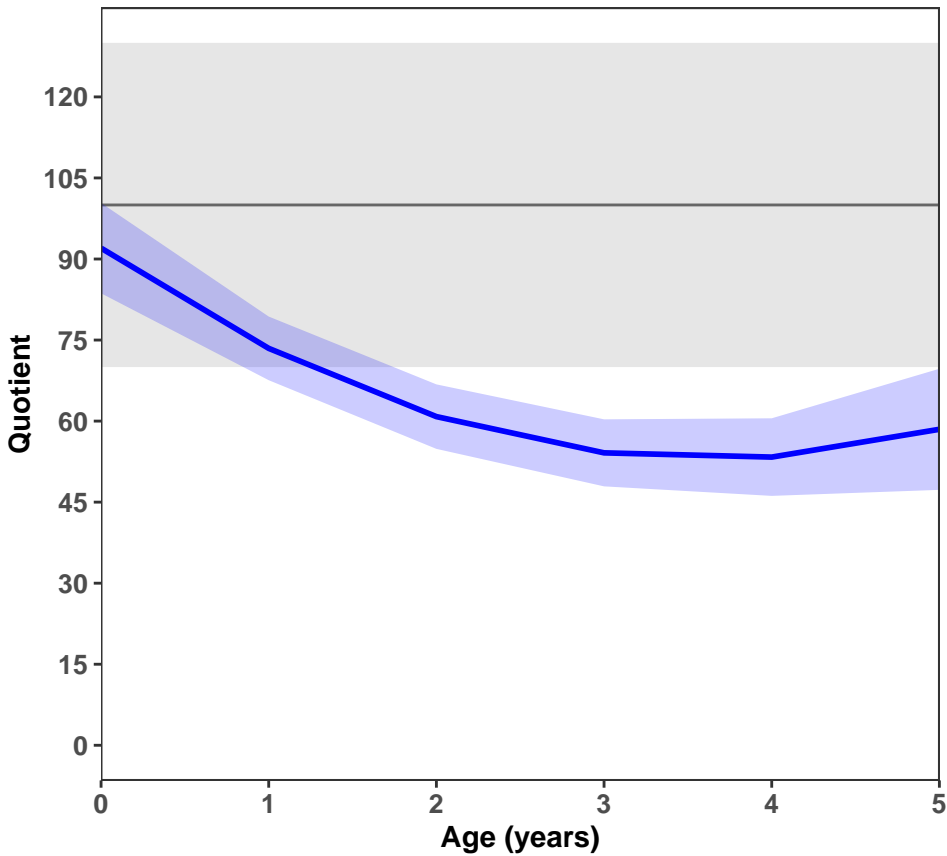

Supplement: ACN3-11-3064-s014.pdf [file ACN3-11-3064-s014.pdf]
